# Supplementary material for: 1D zigzag chain vs. 1D helical chain: the role of the supramolecular interactions on the formation of chiral architecture
Source: Royal Society of Chemistry journal article supplement (doi:10.1039/b917264p), 2009-09-22
Supplement: b917264p.pdf [file b917264p.pdf]

## Supporting Information for

# 1D zigzag chain vs 1D helical chain: the role of the supramolecular interactions in the formation of chiral architecture

Fangna Dai,<sup>a</sup> Haiyan He,<sup>a</sup> Xiaoliang Zhao,<sup>a</sup> Yanxiong Ke,<sup>\*b</sup> Guoqing Zhang,<sup>a</sup> Daofeng Sun<sup>\*a</sup>

*Key Lab for Colloid and Interface Chemistry of Education Ministry, Department of Chemistry, Shandong University, Jinan 250100 (P. R. China), Engineering Research Center of Pharmaceutical Process Chemistry, Ministry of Education, School of Pharmacy, East China University of Science and Technology, 130 Meilong Road, Shanghai 200237, (P. R. China); E-mail: dfsun@sdu.edu.cn; [key@ecust.edu.cn](mailto:key@ecust.edu.cn).*

\*To whom correspondence should be addressed

**General Information.** Commercially available reagents were used as received without further purification. Elemental analyses (C,H,N) were performed with a PerkinElmer 240 elemental analyzer. Thermal gravimetric analysis (TGA) was performed under N<sub>2</sub> on a PerkinElmer TGA 7 instrument. Photoluminescence spectra were performed on a Perkin Elmer LS 50B luminescence spectrometer.

**Synthesis of 2 with bulk homochiral crystallization:** H<sub>2</sub>atiip (0.02 g, 0.04 mmol) , Cd(NO<sub>3</sub>)<sub>2</sub>·4H<sub>2</sub>O (0.02 g, 0.08 mmol) and (S)-N-(1,2,3,4-tetrahydronaphthalen-1-yl)acetamide (0.01g,0.053mmol) were dissolved in 16 mL mixture of dmf, ethonal and H<sub>2</sub>O (v/v = 5:2:1), to which one drop of pyridine was added. The clear solution was allowed to evaporate at 90 ° for two days to give colorless block crystals of **2**.

**Crystal structure determination of compound 1 and 2:** Single-crystal X-ray diffraction was performed using a Bruker Apex II CCD diffractometer equipped with a fine-focus sealed-tube X-ray source (MoK<sub>α</sub> radiation, graphite monochromated). Structures were solved

by direct methods using SHELXTL and were refined by full-matrix least-squares on  $F^2$  using SHELX-97. Non-hydrogen atoms were refined with anisotropic displacement parameters during the final cycles. Hydrogen atoms were placed in calculated positions with isotropic displacement parameters set to  $1.2 \times U_{\text{eq}}$  of the attached atom.

Table S1. Crystal Data Collection and Structure Refinement for compound **1** and **2**

|                                                              | <b>Compound 1</b>                                                             | <b>Compound 2</b>                                                              |
|--------------------------------------------------------------|-------------------------------------------------------------------------------|--------------------------------------------------------------------------------|
| empirical formula                                            | C <sub>14</sub> H <sub>8</sub> CdI <sub>3</sub> N <sub>5</sub> O <sub>4</sub> | C <sub>14</sub> H <sub>12</sub> CdI <sub>3</sub> N <sub>3</sub> O <sub>5</sub> |
| formula weight                                               | 803.35                                                                        | 795.37                                                                         |
| temp (K)                                                     | 298(2)                                                                        | 298(2)                                                                         |
| crystal system                                               | Monoclinic                                                                    | Tetragonal                                                                     |
| space group                                                  | <i>P</i> 2 <sub>1</sub> / <i>c</i>                                            | <i>P</i> 4 <sub>3</sub> 2 <sub>1</sub> 2                                       |
| <i>a</i> (Å)                                                 | 9.701(2)                                                                      | 11.3689(3)                                                                     |
| <i>b</i> (Å)                                                 | 24.227(5)                                                                     | 11.3689(3)                                                                     |
| <i>c</i> (Å)                                                 | 9.861(2)                                                                      | 16.5658(11)                                                                    |
| $\alpha$ (deg)                                               | 90                                                                            | 90                                                                             |
| $\beta$ (deg)                                                | 111.821(4)                                                                    | 90                                                                             |
| $\gamma$ (deg)                                               | 90                                                                            | 90                                                                             |
| <i>V</i> (Å <sup>3</sup> )                                   | 2151.6(8)                                                                     | 2141.16(16)                                                                    |
| <i>Z</i>                                                     | 4                                                                             | 4                                                                              |
| $\rho$ calc (g/cm <sup>3</sup> )                             | 2.486                                                                         | 2.467                                                                          |
| <i>F</i> (000)                                               | 1472                                                                          | 1512                                                                           |
| data/restraints/params                                       | 4889 / 0 / 244                                                                | 2194/0/125                                                                     |
| GOF on <i>F</i> <sup>2</sup>                                 | 1.072                                                                         | 1.053                                                                          |
| final <i>R</i> indices [ <i>I</i> > 2 $\sigma$ ( <i>I</i> )] | <i>R</i> 1 = 0.1077,<br>w <i>R</i> 2 = 0.2923                                 | <i>R</i> 1 = 0.0383,<br>w <i>R</i> 2 = 0.0986                                  |

Table S2. A summary of the 10 structure determinations of complex **2** (*P*4<sub>3</sub>2<sub>1</sub>2) with the *R* factors and Flack absolute structure parameters for each refinement, after being added chiral (R)-N-(1,2,3,4-tetrahydronaphthalen-1-yl)acetamide as the cosolute.

|          | <i>a</i>    | <i>b</i>    | <i>c</i>    | <i>R</i> 1 | w <i>R</i> 1 | Flack parameter |
|----------|-------------|-------------|-------------|------------|--------------|-----------------|
| <b>2</b> | 11.3689(3)  | 11.3689(3)  | 16.5658(11) | 0.0395     | 0.1043       | 0.00(8)         |
| #1       | 11.3702(10) | 11.3702(10) | 16.5651(4)  | 0.0413     | 0.1137       | 0.03(8)         |
| #2       | 11.3687(4)  | 11.3687(4)  | 16.5721(15) | 0.0492     | 0.1642       | 0.07(12)        |
| #3       | 11.3632(2)  | 11.3632(2)  | 16.5725(4)  | 0.0403     | 0.1015       | 0.02(8)         |
| #4       | 11.3736(10) | 11.3736(10) | 16.5547(3)  | 0.0426     | 0.1082       | 0.04(8)         |
| #5       | 11.3672(10) | 11.3672(10) | 16.5682(4)  | 0.0386     | 0.1098       | 0.04(7)         |
| #6       | 11.3591(2)  | 11.3591(2)  | 16.5835(5)  | 0.0415     | 0.1105       | 0.07(8)         |
| #7       | 11.3682(10) | 11.3682(10) | 16.5606(4)  | 0.0406     | 0.1118       | -0.02(8)        |
| #8       | 11.3685(10) | 11.3685(10) | 16.5636(3)  | 0.0434     | 0.1105       | 0.05(8)         |
| #9       | 11.3702(2)  | 11.3702(2)  | 16.5670(5)  | 0.0497     | 0.1114       | 0.04(10)        |

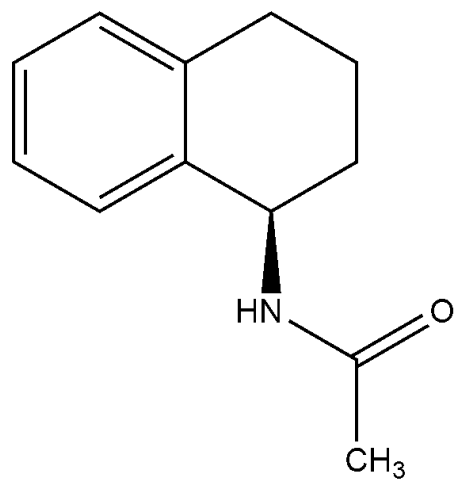

*(R)*-*N*-(1,2,3,4-tetrahydronaphthalen-1-yl)acetamide

**Figure S1.** *(R)*-*N*-(1,2,3,4-tetrahydronaphthalen-1-yl)acetamide.

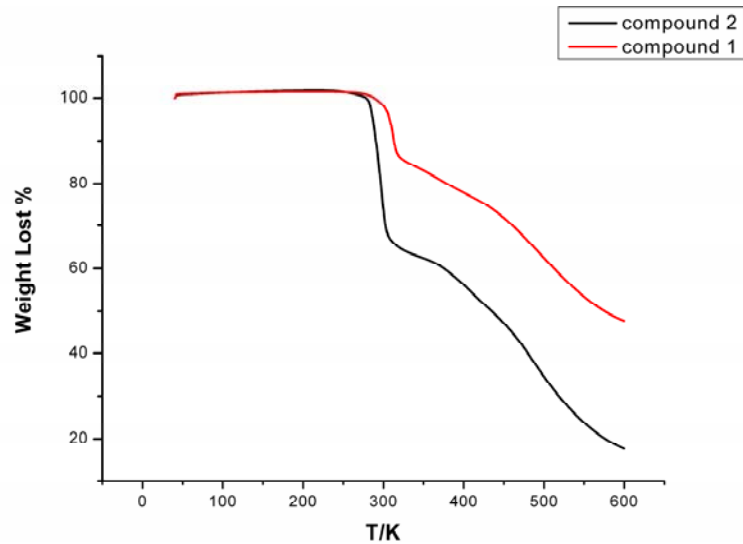

**Figure S2.** TGA for complexes **1** and **2**.

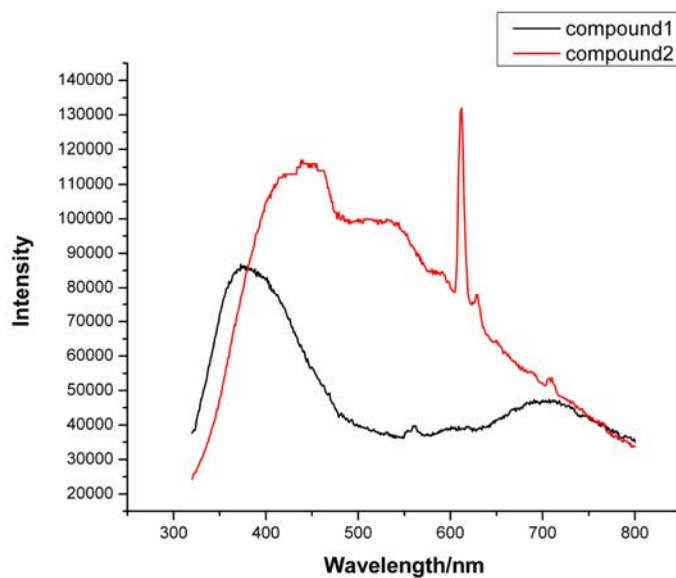

**Figure S3.** Photoluminescence emission spectra for compound **1** and **2** in the solid state at room temperature.
